# Supplementary material for: Deficiency in the cell-adhesion molecule dscaml1 impairs hypothalamic CRH neuron development and perturbs normal neuroendocrine stress axis function
Source: PubMed Central journal article supplement (PMC9978177; doi:10.3389/fcell.2023.1113675), 2023-02-16
Supplement: Presentation1.pdf [file Presentation1.pdf]

Ma et al. 2023.

## Supplementary Figures and Table

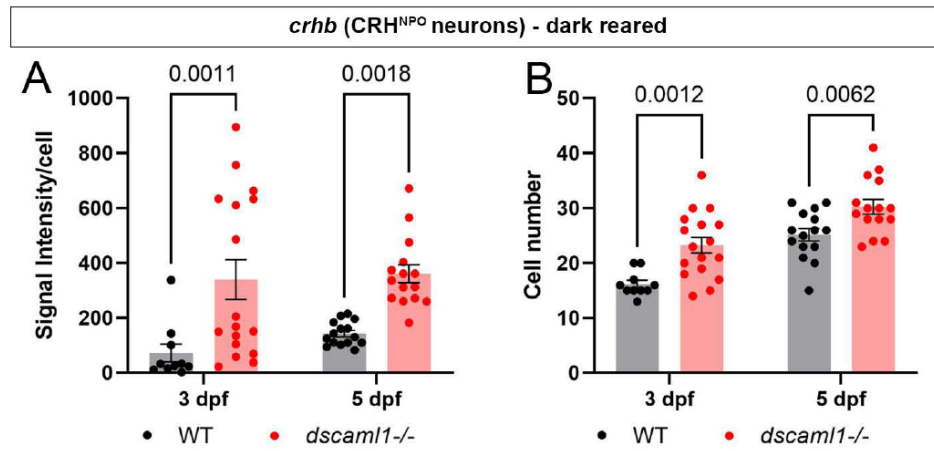

**Supplementary Fig. S1. CRH<sup>NPO</sup> neuron development is impaired in the absence of ambient light (dark reared).** Quantification of CRH<sup>NPO</sup> neurons, labeled by *crhb* FISH. Graphs show the signal intensity per cell (A) and cell number (B). Multiple-comparison corrected *p* values are as shown. WT: n=10 (3 dpf), 15 (5 dpf). *dscaml1*<sup>-/-</sup>: n=17 (3 dpf), 15 (5 dpf)

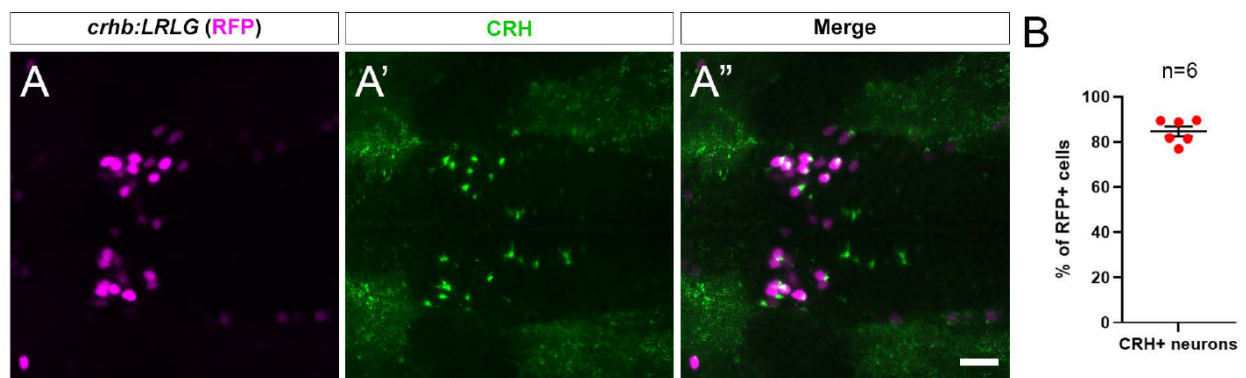

**Supplementary Fig. S2. The *crhb*:LRLG transgenic line labels CRH-expressing neurons.** (A-A'') Most RFP+ neurons (magenta, anti-RFP) express the CRH protein (green, anti-CRH). (B) Percentage of RFP+ neurons that express CRH. Mean, standard error, and sample size are shown. The scale bar is 20  $\mu$ m.

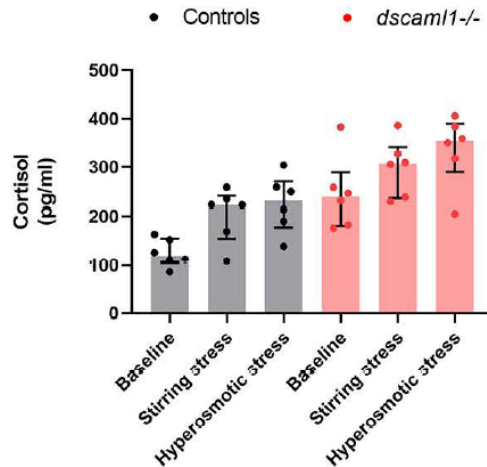

**Supplementary Fig. S3. Non-normalized baseline and stress-induced cortisol profile for 5 dpf larvae at ZT6-8.** Same measurements as Fig. 5B, but without normalization. For each sample (dot), cortisol was extracted from a pool of 30 animals. n=6 for all groups. Controls in black and *dscaml1*<sup>-/-</sup> animals in red. Median and interquartile range are shown.

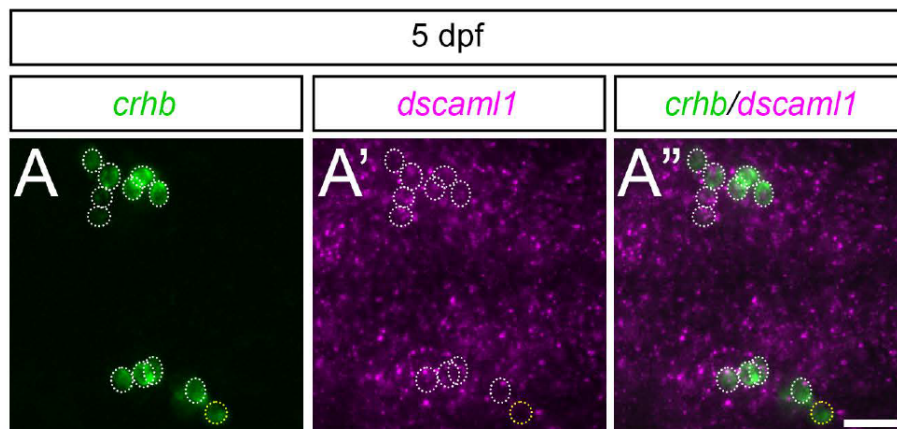

**Supplementary Fig. S4. *dscaml1* is expressed in CRH<sup>NPO</sup> neurons during larval development.** Double FISH with *crhb* (green, A) and *dscaml1* (magenta, A') RNA probes at 5 dpf. Merged image is shown in A''. Dotted circles mark the outline of *crhb*<sup>+</sup> cells that express *dscaml1* (white) or do not express *dscaml1* (yellow). The scale bar is 20  $\mu$ m.

| <b>CRH<sup>NPO</sup> neurons (normal day/night cycle) (Fig. 2E-F)</b> |                     |                |                     |
|-----------------------------------------------------------------------|---------------------|----------------|---------------------|
| <b><i>crhb</i> signal intensity per cell</b>                          | <b>F (DFn, DFd)</b> | <b>P value</b> | <b>Significant?</b> |
| Interaction                                                           | F (2, 71) = 7.649   | P=0.0010       | Yes                 |
| Developmental stage                                                   | F (2, 71) = 10.48   | P=0.0001       | Yes                 |
| Genotype                                                              | F (1, 71) = 43.31   | P<0.0001       | Yes                 |
| <b>Cell number</b>                                                    | <b>F (DFn, DFd)</b> | <b>P value</b> | <b>Significant?</b> |
| Interaction                                                           | F (2, 71) = 9.102   | P=0.0003       | Yes                 |
| Developmental stage                                                   | F (2, 71) = 75.67   | P<0.0001       | Yes                 |
| Genotype                                                              | F (1, 71) = 4.865   | P=0.0306       | Yes                 |

| <b>CRH<sup>NPO</sup> neurons (dark reared) (Supp. Fig. S1)</b> |                     |                |                     |
|----------------------------------------------------------------|---------------------|----------------|---------------------|
| <b><i>crhb</i> signal intensity per cell</b>                   | <b>F (DFn, DFd)</b> | <b>P value</b> | <b>Significant?</b> |
| Interaction                                                    | F (1, 53) = 0.2373  | P=0.6282       | No                  |
| Developmental stage                                            | F (1, 53) = 0.8534  | P=0.3598       | No                  |
| Genotype                                                       | F (1, 53) = 24.36   | P<0.0001       | Yes                 |
| <b>Cell number</b>                                             | <b>F (DFn, DFd)</b> | <b>P value</b> | <b>Significant?</b> |
| Interaction                                                    | F (1, 53) = 0.5935  | P=0.4445       | No                  |
| Developmental stage                                            | F (1, 53) = 36.83   | P<0.0001       | Yes                 |
| Genotype                                                       | F (1, 53) = 21.35   | P<0.0001       | Yes                 |

| <b><i>crhb</i>:LRLG fluorescent positive (Fig. 5G)</b> |                     |                |                     |
|--------------------------------------------------------|---------------------|----------------|---------------------|
| <b>Cell number/hemisphere</b>                          | <b>F (DFn, DFd)</b> | <b>P value</b> | <b>Significant?</b> |
| Interaction                                            | F (1, 45) = 0.5128  | P=0.4776       | No                  |
| Developmental stage                                    | F (1, 45) = 50.97   | P<0.0001       | Yes                 |
| Genotype                                               | F (1, 45) = 7.544   | P=0.0086       | Yes                 |

| <b>Dex treatment (Fig. 7C)</b>               |                     |                |                     |
|----------------------------------------------|---------------------|----------------|---------------------|
| <b><i>crhb</i> signal intensity per cell</b> | <b>F (DFn, DFd)</b> | <b>P value</b> | <b>Significant?</b> |
| Interaction                                  | F (1, 35) = 8.210   | P=0.0070       | Yes                 |
| Treatment                                    | F (1, 35) = 59.48   | P<0.0001       | Yes                 |
| Genotype                                     | F (1, 35) = 11.91   | P=0.0015       | Yes                 |

**Supplementary Table I**
